# Supplementary material for: Small Molecule Inhibitors of Microenvironmental Wnt/β-Catenin Signaling Enhance the Chemosensitivity of Acute Myeloid Leukemia
Source: PubMed Central journal article supplement (PMC7565567; doi:10.3390/cancers12092696), 2020-09-21
Supplement: cancers-12-02696-s001.pdf [file cancers-12-02696-s001.pdf]

# Supplemental material

## Supplemental methods

### *Western blotting*

Cells were lysed with appropriate amount of RIPA buffer (25 mM Tris pH 7.6, 150 mM NaCl, 1% NP40, 1% Na-deoxycholate, 0.1% SDS) supplemented with complete Protease Inhibitor (Roche) and 1 mM Na<sub>3</sub>VO<sub>4</sub>. Proteins were separated on a 10% polyacrylamide gel. Subsequently, proteins were transferred onto nitrocellulose membrane (GE Healthcare), labelled with appropriate antibody and acquired by LAS4000 (GE Healthcare) instrument. Differential expression of  $\beta$ -catenin was evaluated in cytoplasmic and nuclear cell fractions using the same primary antibody, anti- $\beta$ -catenin (1:1000) and NE-PER Kit (Life Technologies) as detection system, according to manufacturer's instructions. GAPDH and Histone H3 were used as loading cytoplasmic and nuclear control, respectively. All samples subjected to immunoblotting contained more than 80% of leukaemia cells.

### *Osteocyte and adipocyte differentiations*

Differentiation assays were performed on MSC confluent monolayer in 24 well-plates. Osteocyte differentiation was induced by using StemMACS OsteoDiff Medium human from Miltenyi Biotechnology. Adipocyte differentiation medium consisted in  $\alpha$ -MEM supplemented with 10% heat-deactivated FBS, 1% L-Glutamine, 100  $\mu$ g/mL IBMX, 1  $\mu$ M Dexamethasone and 10  $\mu$ g/mL insulin. Half medium was changed weekly in each well and the experiment lasted 15 days. Cell differentiation was analyzed by specific stainings. For osteocyte differentiation, cells were washed with PBS, fixed during 5 minutes with 4% paraformaldehyde, wash three times with deionized water and stained with 2% Alizarin (Sigma Aldrich). For adipocyte differentiation, differentiated cells were washed with PBS and fixed with 60% isopropanol for 1 minute at room temperature, then stained with Oil-Red-O for 10 minutes at room temperature. Oil-Red-O was removed and replaced with 60% isopropanol for 30 seconds.

### *Immunoregulation assays*

To assess MSC immunomodulatory capabilities, PBMCs were stained with 5  $\mu$ M 5,6-carboxyfluorescein diacetate succinimidyl ester (CFSE) (Thermo Fisher Scientific). CFSE-labeled cells were seeded on hBM-MSC monolayer stimulated (pMSCs) or not (rMSCs) with proinflammatory cytokines (IFN $\gamma$  and TNF $\alpha$ ). PBMCs were stimulated by adding phytohemagglutinin (5  $\mu$ g/ml) to the culture medium. After 4 days of co-culture, cells were harvested, washed and analyzed by flow cytometry. Relative cell proliferation was expressed as percentage of median CFSE fluorescence of treated cells compared to cells treated with the specific vehicle.

## Supplemental table

**Table S1.** List of patients and their characteristics.

| Patients              | N = 58                                     |
|-----------------------|--------------------------------------------|
| Gender                | Females = 23<br>Males = 35                 |
| Median age            | 57 [16-74]                                 |
| FAB Subtypes (n = 57) | M1/M0 = 14<br>M2 = 13<br>M3 = 3<br>M4 = 16 |

|                               |                                                  |
|-------------------------------|--------------------------------------------------|
|                               | M5=5                                             |
|                               | M6/M7 = 1                                        |
|                               | AML-MDS = 5                                      |
|                               | Other = 1                                        |
| Blood Parameters              | Hb (g/dL) = 8.7 [3.16 – 12.9]                    |
|                               | PLT (10 <sup>9</sup> /L) = 67,500 [600; 319,000] |
|                               | RBC (10 <sup>12</sup> /L) = 20,050 [500; 21,800] |
| ELN/WHO stratification (n=51) | Good = 22                                        |
|                               | Intermediate = 17                                |
|                               | Adverse =18                                      |
| Induction therapy (58)        | 7+3 = 26                                         |
|                               | MICE =26                                         |
|                               | FLAI = 2                                         |
|                               | Other = 4                                        |
|                               |                                                  |
| HSCT transplantation (n=29)   | Three-year remission =10                         |
|                               | Relapse within 3 years = 19                      |

| Patient ID | Gender | Age | FAB     | Risk Stratification |
|------------|--------|-----|---------|---------------------|
| Patient 1  | M      | 48  | M2      | Intermediate        |
| Patient 2  | F      | 57  | M2      | Intermediate        |
| Patient 3  | F      | 69  | M4      | Intermediate        |
| Patient 4  | F      | 16  | M5      | Intermediate        |
| Patient 5  | F      | 70  | M2      | Good                |
| Patient 6  | M      | 64  | M4      | Adverse             |
| Patient 7  | M      | 22  | M0/M1   | Intermediate        |
| Patient 8  | M      | 35  | M0/M1   | Good                |
| Patient 9  | M      | 62  | M1      | Good                |
| Patient 10 | M      | 52  | M4eo    | Good                |
| Patient 11 | M      | 64  | M3      | Good                |
| Patient 12 | M      | 34  | M2      | Adverse             |
| Patient 13 | F      | 68  | M0/M1   | Intermediate        |
| Patient 14 | F      | 27  | M3      | Good                |
| Patient 15 | F      | 72  | AML-MDS | Intermediate        |
| Patient 16 | F      | 53  | M2      | Adverse             |
| Patient 17 | M      | 61  | M1      | Adverse             |
| Patient 18 | F      | 51  | AML-MDS | Good                |
| Patient 19 | M      | 70  | M4      | Good                |
| Patient 20 | F      | 58  | M4      | Good                |
| Patient 21 | M      | 27  | M2      | Good                |
| Patient 22 | M      | 63  | M2      | Adverse             |
| Patient 23 | M      | 34  | M4      | Adverse             |
| Patient 24 | F      | 48  | AML-MDS | Adverse             |
| Patient 25 | M      | 67  | nas     | Adverse             |
| Patient 26 | F      | 62  | M4      | Good                |
| Patient 27 | M      | 42  | M4      | Good                |
| Patient 28 | M      | 60  | M2/M4   | Intermediate        |
| Patient 29 | M      | 72  | M4      | Adverse             |
| Patient 30 | M      | 35  | M2      | Good                |
| Patient 31 | M      | 54  | M5      | Adverse             |
| Patient 32 | F      | 68  | M4      | Good                |

|            |   |    |         |              |
|------------|---|----|---------|--------------|
| Patient 33 | F | 45 | M5      | Intermediate |
| Patient 34 | M | 56 | M5      | Intermediate |
| Patient 35 | F | 51 | M5b     | Intermediate |
| Patient 36 | M | 54 | M0/M1   | Adverse      |
| Patient 37 | F | 61 | M0/M1   | Intermediate |
| Patient 38 | M | 19 | M4 eo   | Good         |
| Patient 39 | M | 19 | M1      | Adverse      |
| Patient 40 | M | 66 | M0      | Adverse      |
| Patient 41 | M | 60 | M4/M5   | Intermediate |
| Patient 42 | F | 67 | M4      | Adverse      |
| Patient 43 | M | 68 | M0      | Intermediate |
| Patient 44 | F | 44 | M4      | Good         |
| Patient 45 | M | 65 | M1      | Good         |
| Patient 46 | M | 67 | M4      | Good         |
| Patient 47 | F | 69 | M2      | Intermediate |
| Patient 48 | M | 59 | AML-MDS | Adverse      |
| Patient 49 | F | 60 | M6/M7   | Adverse      |
| Patient 50 | M | 27 | M0      | Adverse      |
| Patient 51 | M | 40 | M2      | Good         |
| Patient 52 | F | 65 | M1      | Good         |
| Patient 53 | F | 40 | M2      | Good         |
| Patient 54 | M | 74 | AML-MDS | N.V.         |
| Patient 55 | M | 38 | M2      | Intermediate |
| Patient 56 | M | 57 | M4      | Adverse      |
| Patient 57 | F | 32 | M3      | Good         |
| Patient 58 | M | 44 | M0      | Intermediate |

**Legend:** ELN: European Leukemia Network ; WHO : World Health Organization; 7+3 protocol: 3 days of anthracycline + 7 days of Ara-C; MICE protocol: 3 days of Mitoxantrone and Etoposide + 7 days of Ara-C; FLAI protocol: 5 days of Fludarabin and Ara-C + 2 days of Idarubicin; HSCT: allogeneic hematopoietic stem cell transplantation; AML-MDS: AML secondary to myelodysplasia.

### Supplemental figures

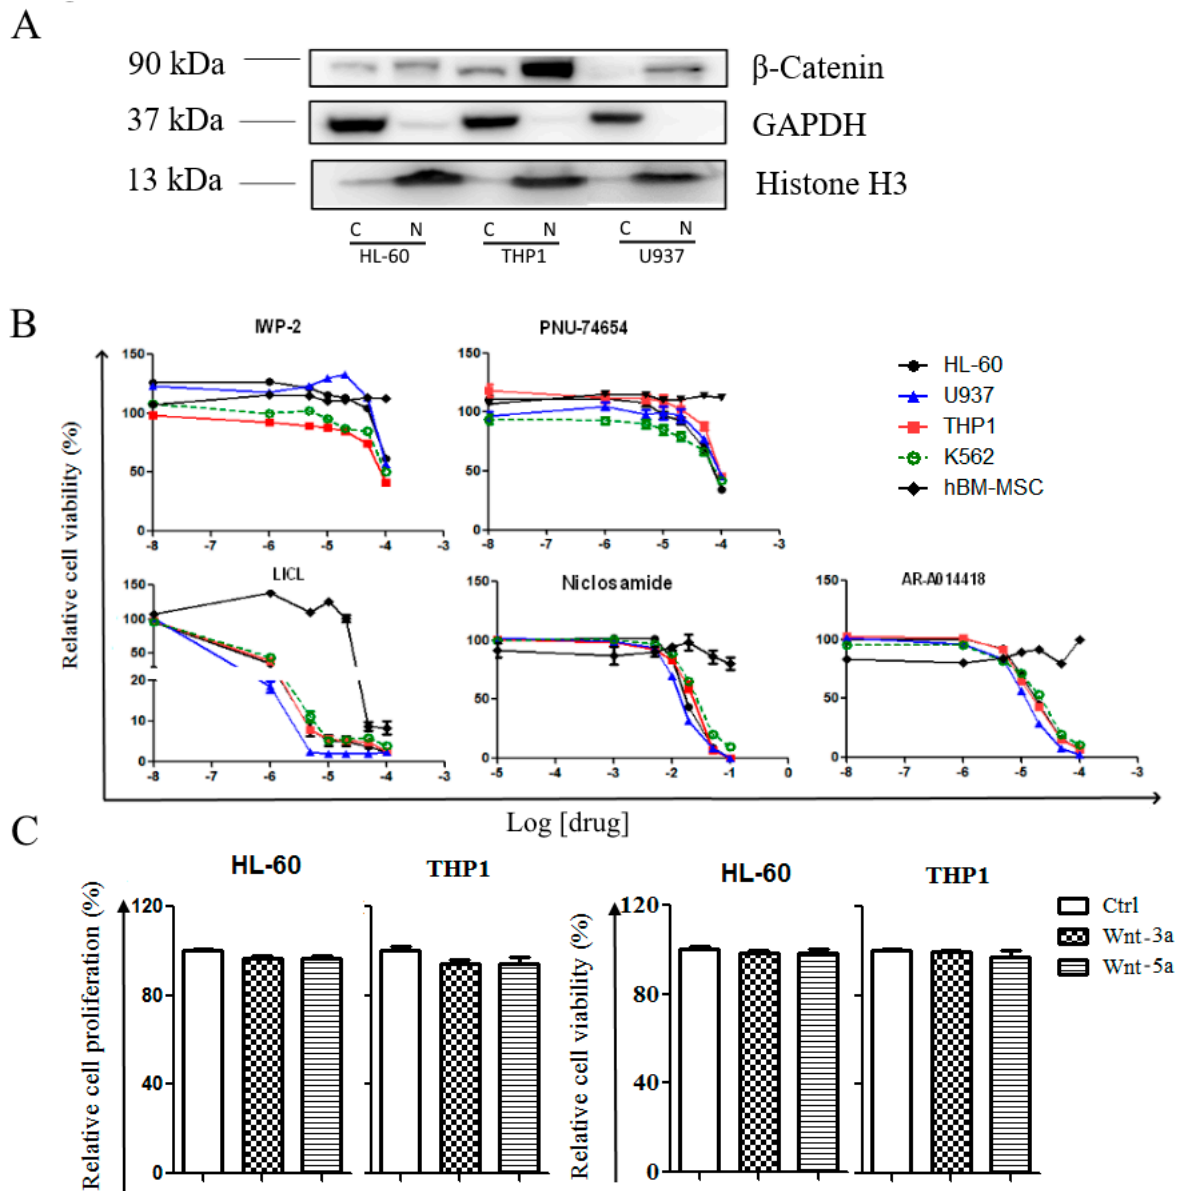

Figure S1

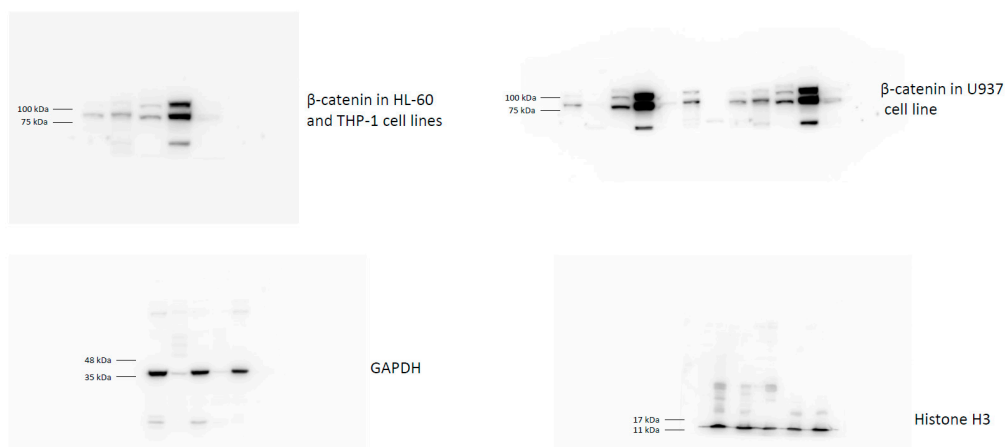

**Figure S1.** Wnt expression and activity in AML cell lines. (A) Western blot analysis of  $\beta$ -catenin in cytoplasmic and nuclear fraction of AML cell lines HL-60, THP1 and U937. (B) MTS analysis of AML cell lines treated with increasing concentrations of Wnt and GSK-3 inhibitors. Data are

representative of 4 independent experiments. (C) Cell proliferation and viability of AML cell lines cultured in presence of Wnt ligands Wnt-3a (25 ng/mL) and Wnt-5a (25 ng/mL).

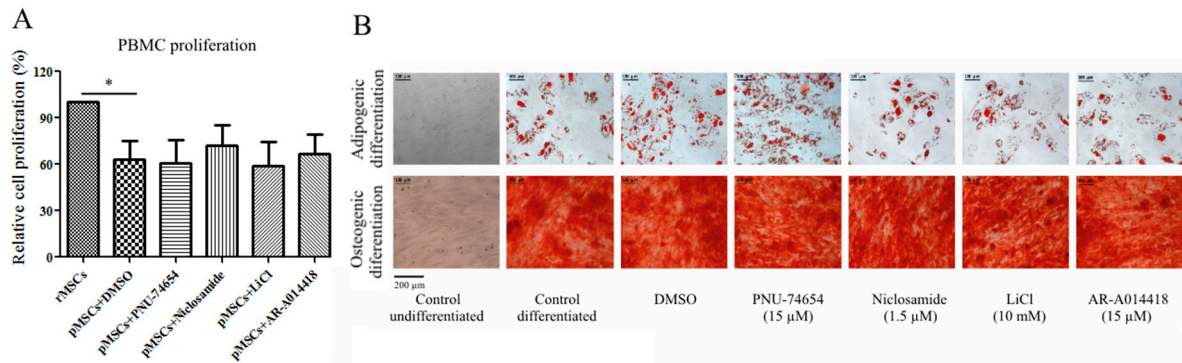

**Figure S2.** Differentiation and immunomodulatory capabilities of hBM-MSCs in presence of Wnt and GSK-3 inhibitors. (A) Oil-red-Oil (upper panel) and Alizarin red stainings of hBM-MSCs incubated for 15 days with adipogenic or osteogenic differentiation media, respectively. (B) Proliferation of activated PBMCs grown on hBM-MSCs primed with IFN- $\gamma$  and TNF $\alpha$  (pMSCs) or not (rMSCs). Data are representative of at least 3 experiments performed in duplicate. \*p<0.05.

Figure 5 (Part 1/2)

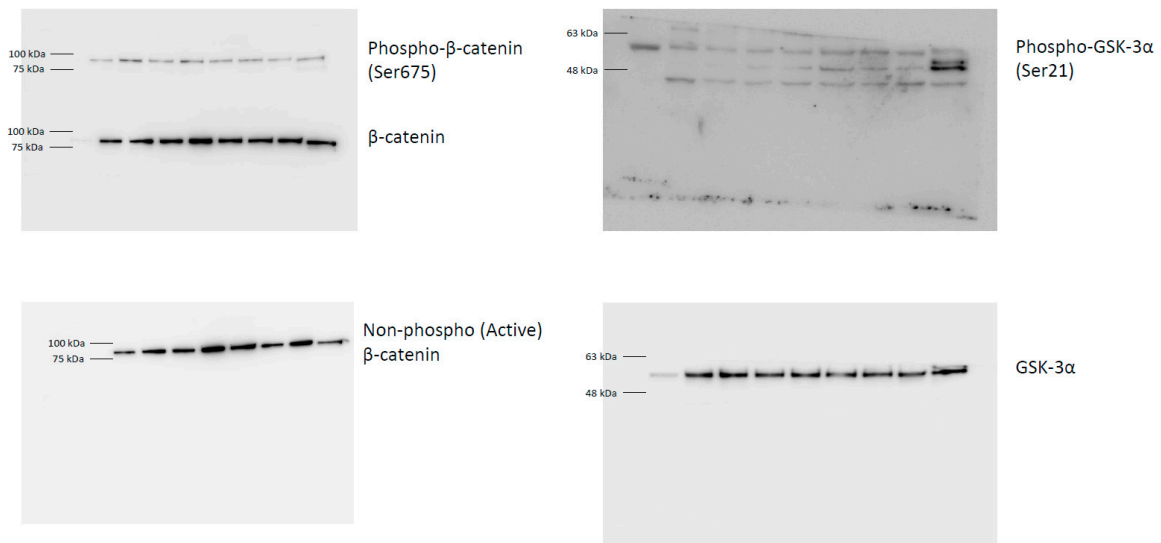

Figure 5 (Part 2/2)

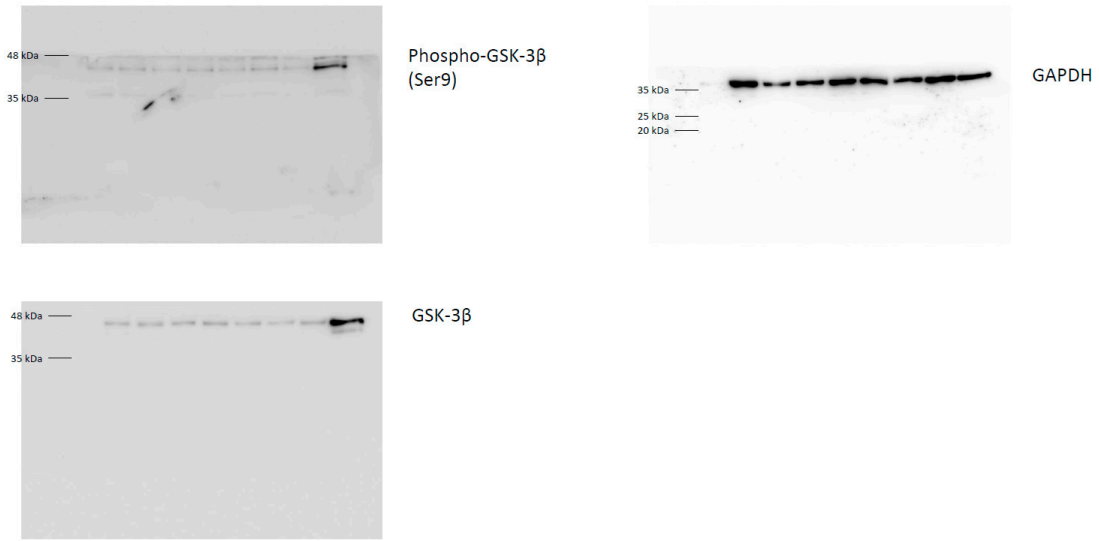

Figure S3. Original Western blot figures (Figure 5).

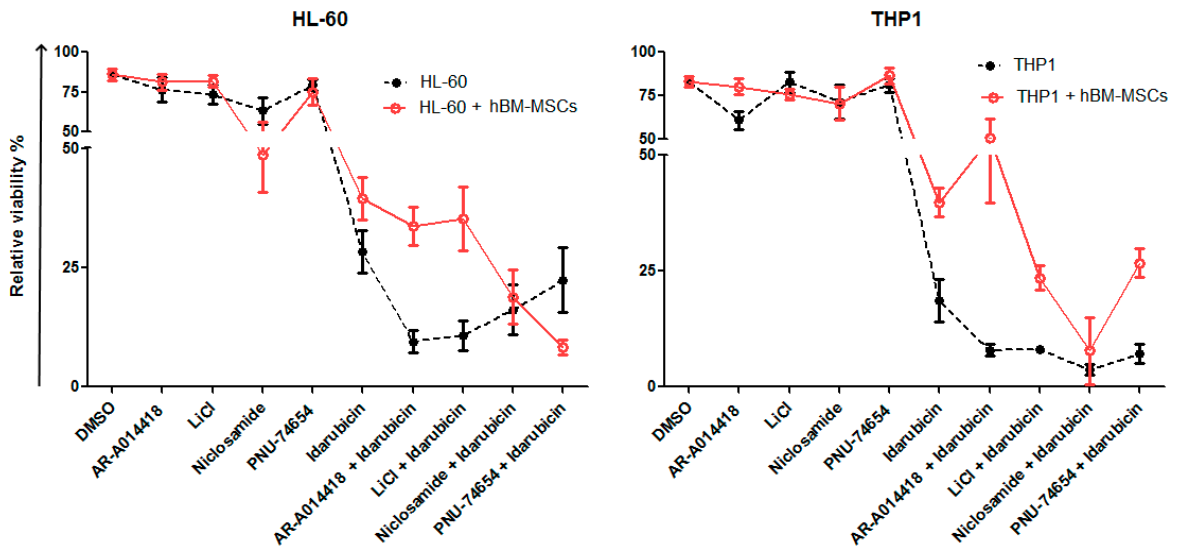

Figure S4. Contribution of Wnt modulators to AML cell lines chemosensitivity. AML cell lines (HL-60, THP1) were treated with Ara-C or Idarubicin in the presence or absence of hBM-MSCs and Wnt or GSK-3 inhibitors. After 4 days, cells were stained with TOPRO-3 to exclude dead cells. Viable cells (TOPRO-3 negative cells) were quantified by FACS analysis. Data are reported as mean  $\pm$  SEM of at least 4 independent experiments.

Figure 6 (Part 1/4)

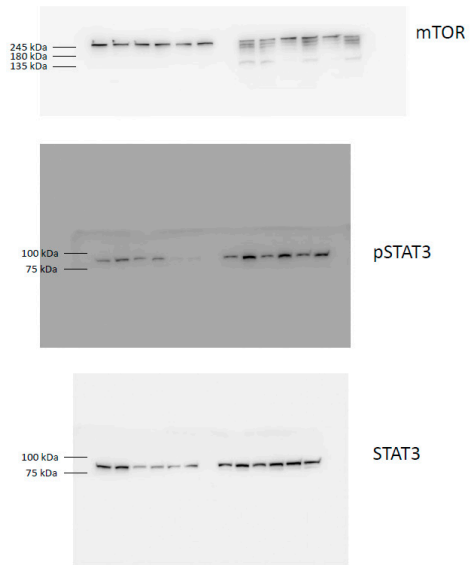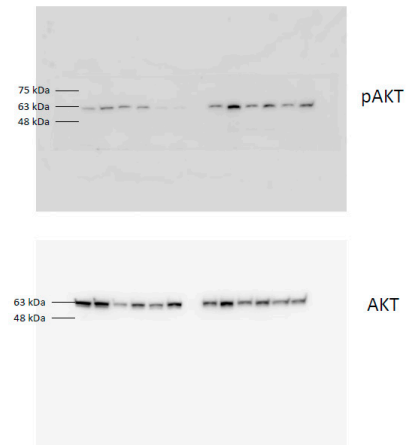

Figure 6 (Part 2/4)

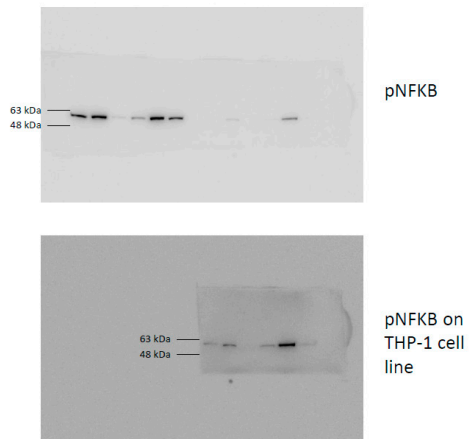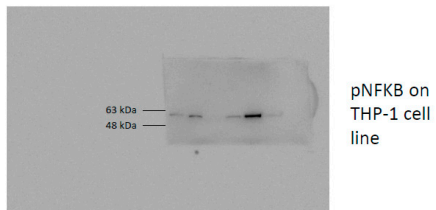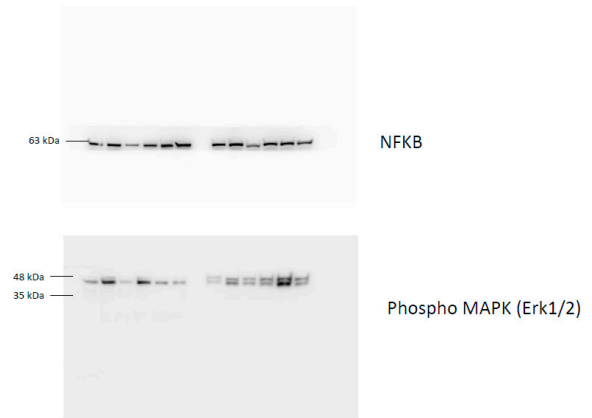

Figure 6 (Part 3/4)

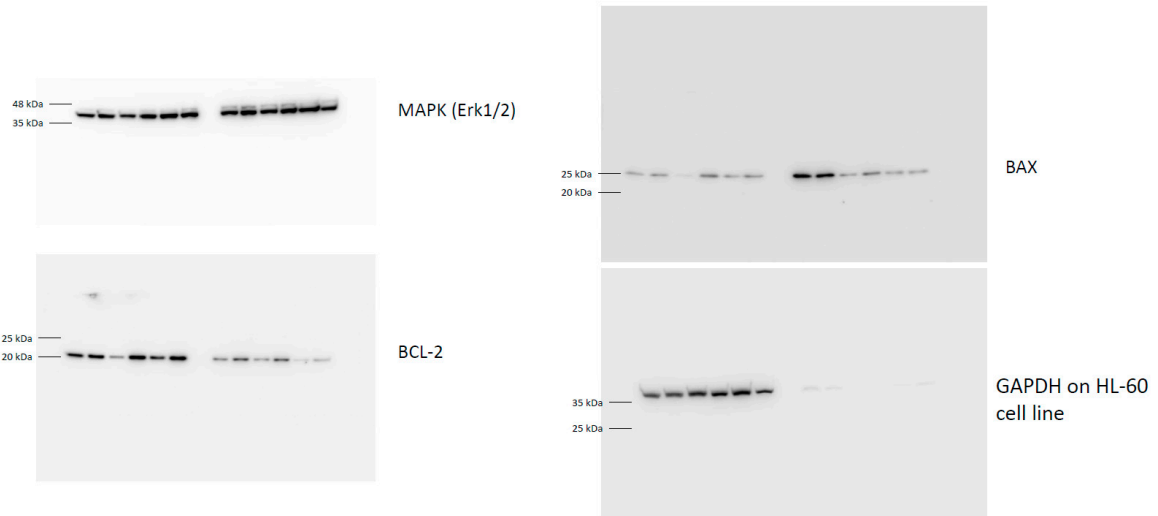

Figure 6 (Part 4/4)

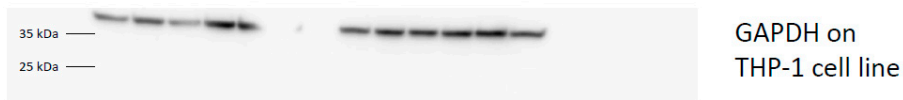

Figure S5. Original Western blot figures (Figure 6).

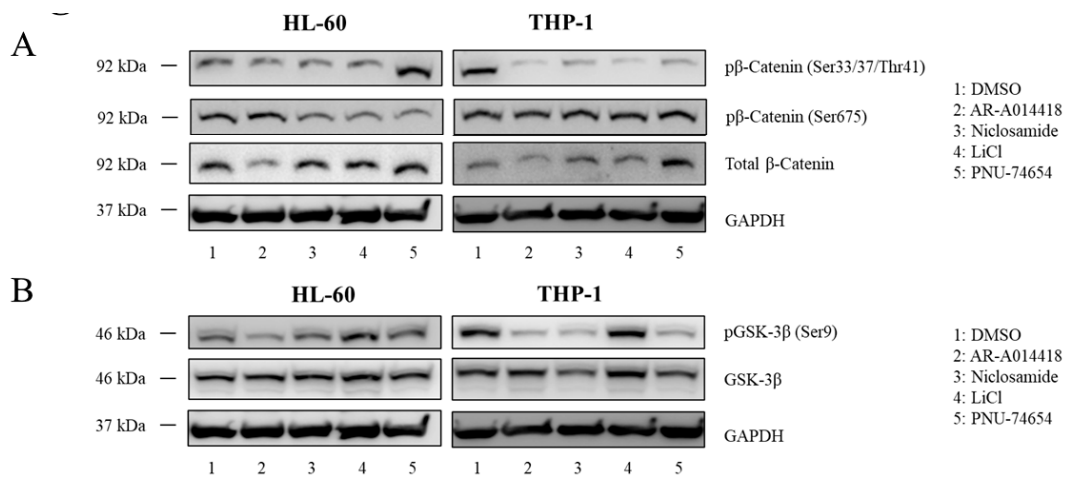

**Figure S6.** Representative Western blot analysis of HL-60 and THP1 cell lines treated for 48 hours with Wnt or GSK-3 inhibitors, including PNU 74654 (15 μM), IWP-2 (15 μM), Niclosamide (1 μM), LiCl (15 mM) and AR-A014418 (15 μM). Data are representative of 2 independent experiments.
